# Supplementary material for: Carbonless DNA
Source: Royal Society of Chemistry journal article supplement (doi:10.1039/d4cp04410j), 2025-01-01
Supplement: d4cp04410j1.pdf [file d4cp04410j1.pdf]

## Carbonless DNA

Piotr Skurski<sup>1,2,3,\*</sup> and Jakub Brzeski<sup>1,2</sup>

<sup>1</sup> *Faculty of Chemistry, University of Gdańsk,*

*Wita Stwosza 63, 80-308 Gdańsk, Poland*

<sup>2</sup> *QSAR Lab Ltd., Trzy Lipy 3, 80-172, Poland*

<sup>3</sup> *Department of Chemistry, University of Utah, Salt Lake City, Utah 84112, U.S.A.*

## Supplementary Information

---

\* corresponding author: [piotr.skurski@ug.edu.pl](mailto:piotr.skurski@ug.edu.pl)

**Cartesian coordinates (in Å) of carbonless DNA(dimer) and DNA(hexamer)  
discussed in this work**

**Carbonless DNA(dimer)**

|    |              |              |              |
|----|--------------|--------------|--------------|
| 7  | 1.362537000  | -0.919104000 | -1.612997000 |
| 7  | 9.655691000  | -2.709865000 | -0.900763000 |
| 5  | 8.531223000  | -0.708635000 | 0.283976000  |
| 8  | 8.880893000  | -3.599703000 | -0.165464000 |
| 7  | 5.293737000  | -2.049433000 | -1.204805000 |
| 8  | 7.705088000  | -1.846359000 | -1.773343000 |
| 7  | 2.265329000  | 0.028050000  | -1.463808000 |
| 5  | 1.619142000  | -2.434497000 | -1.681201000 |
| 7  | 8.878128000  | -1.523311000 | -1.093249000 |
| 7  | 3.760592000  | -3.778261000 | -1.356121000 |
| 7  | 3.043902000  | -2.593273000 | -1.424750000 |
| 7  | 3.514387000  | -0.139819000 | -1.341255000 |
| 8  | 0.705208000  | -3.291537000 | -1.931187000 |
| 5  | 5.140865000  | -3.481905000 | -1.229238000 |
| 5  | 6.501171000  | -1.199947000 | -1.076647000 |
| 5  | 3.961150000  | -1.529615000 | -1.320954000 |
| 7  | 1.811827000  | 1.312886000  | -1.514237000 |
| 7  | 7.051920000  | -1.130170000 | 0.428251000  |
| 8  | 8.642364000  | 0.698546000  | -0.153325000 |
| 1  | 0.383789000  | -0.584648000 | -1.669057000 |
| 1  | 9.747125000  | -3.113083000 | -1.838010000 |
| 1  | 9.277558000  | -1.037559000 | 1.163965000  |
| 1  | 9.444445000  | -0.914239000 | -1.693055000 |
| 1  | 6.001886000  | -4.315839000 | -1.145338000 |
| 1  | 6.346617000  | -0.068062000 | -1.471603000 |
| 1  | 6.485988000  | -0.491042000 | 0.987079000  |
| 1  | 6.982853000  | -2.042376000 | 0.876732000  |
| 1  | 0.821894000  | 1.383973000  | -1.244593000 |
| 1  | 2.437645000  | 1.897507000  | -0.952221000 |
| 1  | 8.068412000  | -3.748446000 | -0.682564000 |
| 7  | 0.062010000  | -1.176599000 | 1.423655000  |
| 7  | 5.758711000  | 2.411411000  | -0.713945000 |
| 5  | 5.410207000  | 4.305785000  | 1.103499000  |
| 7  | 1.434458000  | -3.222861000 | 1.542452000  |
| 8  | 6.342639000  | 1.786640000  | 0.400616000  |
| 7  | 3.430541000  | 1.218883000  | 2.021657000  |
| 8  | 3.634255000  | 2.908768000  | 0.198144000  |
| 7  | -0.022481000 | 0.105378000  | 1.411318000  |
| 5  | 1.358035000  | -1.819349000 | 1.613084000  |
| 7  | 4.865302000  | 3.408623000  | -0.185060000 |
| 7  | 3.768242000  | -1.080567000 | 2.143602000  |
| 1  | 4.075892000  | -2.018290000 | 2.341723000  |
| 7  | 2.417674000  | -0.893750000 | 1.872129000  |
| 7  | 0.866569000  | 1.027216000  | 1.547620000  |
| 5  | 4.395683000  | 0.192191000  | 2.267758000  |
| 5  | 3.540595000  | 2.690064000  | 1.744084000  |
| 8  | 8.527261000  | 3.126996000  | -0.247067000 |
| 5  | 2.189847000  | 0.515950000  | 1.811831000  |
| 7  | 4.900947000  | 3.358317000  | 2.238175000  |
| 15 | 7.994252000  | 1.901382000  | 0.645838000  |
| 8  | 8.149113000  | 1.948738000  | 2.128171000  |
| 8  | 4.681481000  | 5.525719000  | 1.097808000  |
| 1  | 5.143445000  | 1.671945000  | -1.086961000 |
| 1  | 6.618669000  | 4.411689000  | 1.041585000  |

|    |              |              |              |
|----|--------------|--------------|--------------|
| 1  | -0.980444000 | 0.442908000  | 1.250071000  |
| 1  | 4.682472000  | 4.031314000  | -0.973790000 |
| 1  | 5.553380000  | 0.313872000  | 2.557434000  |
| 1  | 2.597799000  | 3.339045000  | 2.131592000  |
| 1  | 4.719676000  | 3.907134000  | 3.073697000  |
| 1  | 5.613847000  | 2.663690000  | 2.466405000  |
| 1  | 0.605490000  | -3.727466000 | 1.236736000  |
| 1  | 2.296762000  | -3.710219000 | 1.358364000  |
| 1  | 5.238037000  | 6.280135000  | 0.912027000  |
| 5  | -3.502876000 | -1.449128000 | 0.969233000  |
| 8  | -8.537494000 | -3.336057000 | 1.592817000  |
| 7  | -3.513422000 | -5.813547000 | 0.425483000  |
| 8  | -3.090293000 | -0.127877000 | 1.129443000  |
| 1  | -3.774030000 | 0.531687000  | 0.981171000  |
| 8  | -8.614359000 | 0.792607000  | 0.561271000  |
| 7  | -2.432857000 | -2.379965000 | 1.030966000  |
| 5  | -8.494421000 | -0.681466000 | 0.442734000  |
| 7  | -2.572606000 | -3.714253000 | 0.859428000  |
| 7  | -7.151373000 | -1.107488000 | -0.215554000 |
| 5  | -5.101433000 | -3.292618000 | 0.515898000  |
| 5  | -3.809310000 | -4.286561000 | 0.551002000  |
| 7  | -4.866432000 | -1.892969000 | 0.757955000  |
| 5  | -6.016360000 | -0.942426000 | 0.892388000  |
| 8  | -1.480748000 | -4.428519000 | 1.004656000  |
| 8  | -6.816083000 | -1.289587000 | 2.163077000  |
| 7  | -8.186778000 | -1.115480000 | 1.978248000  |
| 7  | -8.891778000 | -2.279495000 | 2.418293000  |
| 1  | -1.452154000 | -2.074308000 | 1.159392000  |
| 1  | -9.475566000 | -1.229879000 | 0.026462000  |
| 1  | -7.206759000 | -2.087917000 | -0.495670000 |
| 1  | -6.944830000 | -0.572995000 | -1.059440000 |
| 1  | -6.257797000 | -3.641749000 | 0.313602000  |
| 1  | -5.699399000 | 0.232042000  | 0.913629000  |
| 1  | -8.503800000 | -0.362782000 | 2.597764000  |
| 1  | -8.498099000 | -2.480894000 | 3.342434000  |
| 1  | -2.468674000 | -5.751793000 | 0.645091000  |
| 1  | -3.988298000 | -6.404573000 | 1.103002000  |
| 1  | -3.658148000 | -6.203479000 | -0.502291000 |
| 1  | -7.566158000 | -3.426201000 | 1.625735000  |
| 7  | -1.835974000 | 0.871095000  | -1.520041000 |
| 8  | -6.783547000 | 2.164949000  | -0.560684000 |
| 8  | -8.540581000 | 1.195617000  | -2.060006000 |
| 8  | -1.021923000 | 1.704338000  | -1.078228000 |
| 8  | -4.505132000 | 5.579749000  | -0.878054000 |
| 7  | -1.464223000 | -0.304988000 | -1.793439000 |
| 8  | -9.232601000 | 3.032217000  | -0.244988000 |
| 5  | -5.323892000 | 4.441065000  | -1.089378000 |
| 5  | -2.407644000 | -1.359804000 | -2.210930000 |
| 7  | -4.619354000 | 3.422910000  | -2.054163000 |
| 15 | -8.376465000 | 1.742273000  | -0.683860000 |
| 5  | -4.144798000 | 0.368198000  | -2.091901000 |
| 7  | -3.786419000 | -0.951880000 | -2.375304000 |
| 7  | -3.141157000 | 1.317712000  | -1.676869000 |
| 5  | -3.470587000 | 2.740071000  | -1.197847000 |
| 8  | -4.151843000 | 2.602510000  | 0.170966000  |
| 7  | -5.210557000 | 3.492172000  | 0.294538000  |
| 7  | -1.911550000 | -2.636585000 | -2.413559000 |
| 7  | -6.405263000 | 2.808008000  | 0.643144000  |
| 1  | -6.497428000 | 4.630196000  | -1.316826000 |
| 1  | -4.211554000 | 3.921451000  | -2.840317000 |
| 1  | -5.297401000 | 2.751518000  | -2.413051000 |

|   |              |              |              |
|---|--------------|--------------|--------------|
| 1 | -5.276690000 | 0.752412000  | -2.185821000 |
| 1 | -4.488488000 | -1.622719000 | -2.648295000 |
| 1 | -2.539680000 | 3.488069000  | -1.169976000 |
| 1 | -5.007643000 | 4.106849000  | 1.087410000  |
| 1 | -6.090245000 | 2.025106000  | 1.230370000  |
| 1 | -0.921315000 | -2.903313000 | -2.225309000 |
| 1 | -2.518316000 | -3.406440000 | -2.645515000 |
| 1 | -5.014393000 | 6.387966000  | -0.839881000 |
| 1 | 8.240085000  | 3.960921000  | 0.147194000  |
| 1 | -9.284186000 | 3.673624000  | -0.963049000 |
| 1 | 3.226420000  | -4.621487000 | -1.500621000 |

### Carbonless DNA(hexamer)

|   |               |              |              |
|---|---------------|--------------|--------------|
| 7 | -4.620713000  | 0.871877000  | -1.811076000 |
| 7 | -3.336270000  | 2.739717000  | -2.795761000 |
| 7 | -5.478012000  | 0.451365000  | -0.962836000 |
| 5 | -4.306498000  | 2.302010000  | -1.897738000 |
| 7 | -5.134256000  | 4.464140000  | -0.822075000 |
| 1 | -4.666512000  | 5.031826000  | -1.513653000 |
| 7 | -5.113280000  | 3.094506000  | -1.020956000 |
| 7 | -6.208514000  | 1.061210000  | -0.086676000 |
| 5 | -6.026750000  | 2.493423000  | -0.108370000 |
| 5 | -8.584901000  | 4.782128000  | 3.645415000  |
| 8 | -9.032646000  | 3.788927000  | 1.442532000  |
| 7 | -9.508531000  | 4.777715000  | 2.297755000  |
| 7 | -6.653719000  | 3.541204000  | 0.667953000  |
| 5 | -6.097370000  | 4.760353000  | 0.166831000  |
| 1 | -6.306531000  | 5.881570000  | 0.578748000  |
| 5 | -7.597875000  | 3.356007000  | 1.788299000  |
| 7 | -7.252313000  | 4.360230000  | 3.005231000  |
| 1 | -7.619237000  | 2.210970000  | 2.200935000  |
| 1 | -6.590532000  | 3.915456000  | 3.649011000  |
| 1 | -6.783328000  | 5.186872000  | 2.627957000  |
| 8 | -9.198404000  | 3.685663000  | 4.433622000  |
| 1 | -8.623442000  | 5.867588000  | 4.174011000  |
| 1 | -5.575656000  | -0.573838000 | -0.976072000 |
| 1 | -10.430291000 | 4.453525000  | 2.615320000  |
| 1 | -2.898588000  | 2.064493000  | -3.424600000 |
| 1 | -2.822239000  | 3.599014000  | -2.684428000 |
| 8 | -2.322046000  | 3.586668000  | 0.438553000  |
| 7 | -4.442405000  | 0.878819000  | 2.936469000  |
| 5 | -3.673885000  | 0.516659000  | 1.754933000  |
| 5 | -4.520126000  | 2.259063000  | 3.304253000  |
| 5 | -3.724149000  | 3.330710000  | 2.343061000  |
| 8 | -3.478936000  | -0.785171000 | 1.295977000  |
| 1 | -3.667328000  | -1.437066000 | 1.980343000  |
| 7 | -3.022266000  | 1.495007000  | 0.963305000  |
| 7 | -3.028587000  | 2.814839000  | 1.252875000  |
| 1 | -2.402720000  | 1.212453000  | 0.175020000  |
| 7 | -8.300231000  | 0.664108000  | 4.187340000  |
| 5 | -6.615252000  | -0.621170000 | 5.672285000  |
| 8 | -7.547645000  | 1.720635000  | 4.743246000  |
| 8 | -6.530806000  | -0.527444000 | 3.235359000  |
| 7 | -7.433498000  | -0.480350000 | 4.276792000  |
| 5 | -5.087101000  | -0.238505000 | 3.705963000  |
| 7 | -5.313812000  | 0.092644000  | 5.244809000  |
| 1 | -4.472303000  | -1.294830000 | 3.627482000  |
| 1 | -5.418445000  | 1.108891000  | 5.344938000  |
| 1 | -4.513839000  | -0.180922000 | 5.821389000  |
| 8 | -9.559916000  | 2.180212000  | 6.347922000  |

|    |              |              |             |
|----|--------------|--------------|-------------|
| 15 | -8.366740000 | 2.920124000  | 5.552060000 |
| 8  | -7.334066000 | 3.674153000  | 6.308868000 |
| 8  | -6.420320000 | -2.089677000 | 5.803064000 |
| 7  | -3.498647000 | 4.870236000  | 2.242079000 |
| 1  | -2.838830000 | 4.818572000  | 1.388984000 |
| 1  | -3.057397000 | 5.323479000  | 3.040454000 |
| 1  | -4.326513000 | 5.401825000  | 1.965480000 |
| 1  | -8.274641000 | 0.890372000  | 3.176727000 |
| 1  | -7.232072000 | -0.131171000 | 6.590196000 |
| 1  | -5.126089000 | 2.568558000  | 4.322185000 |
| 1  | -8.066350000 | -1.280384000 | 4.165322000 |
| 7  | 1.309945000  | 0.382516000  | 0.855155000 |
| 7  | 0.221157000  | 2.499486000  | 1.552600000 |
| 7  | 1.393677000  | -0.896557000 | 0.890910000 |
| 5  | 0.342076000  | 1.092685000  | 1.684674000 |
| 7  | -1.276264000 | 0.485636000  | 3.571086000 |
| 1  | -1.558697000 | 1.447300000  | 3.699675000 |
| 7  | -0.381050000 | 0.217911000  | 2.551952000 |
| 7  | 0.759653000  | -1.778508000 | 1.580851000 |
| 5  | -0.175873000 | -1.191957000 | 2.506440000 |
| 7  | -4.467128000 | -3.957963000 | 4.424076000 |
| 5  | -2.230552000 | -5.031592000 | 5.136077000 |
| 8  | -4.049593000 | -3.051824000 | 5.425561000 |
| 8  | -2.584430000 | -3.699164000 | 3.094864000 |
| 7  | -3.246725000 | -4.547432000 | 3.954482000 |
| 7  | -1.012336000 | -1.817861000 | 3.510776000 |
| 5  | -1.682306000 | -0.730254000 | 4.167697000 |
| 1  | -2.411633000 | -0.802306000 | 5.127570000 |
| 5  | -1.180334000 | -3.277643000 | 3.646236000 |
| 7  | -1.310935000 | -3.785555000 | 5.163624000 |
| 1  | -0.320297000 | -3.933183000 | 3.091010000 |
| 1  | -0.384399000 | -3.971446000 | 5.559558000 |
| 1  | -1.754063000 | -3.063833000 | 5.738041000 |
| 8  | -5.775205000 | -4.102519000 | 7.072601000 |
| 15 | -5.176269000 | -2.684830000 | 6.589215000 |
| 8  | -4.465100000 | -1.817024000 | 7.566916000 |
| 8  | -1.563073000 | -6.208657000 | 4.537358000 |
| 1  | -4.727401000 | -3.324134000 | 3.651456000 |
| 1  | -2.848384000 | -5.270332000 | 6.148504000 |
| 1  | 2.106045000  | -1.259061000 | 0.237198000 |
| 1  | -3.550932000 | -5.370632000 | 3.421232000 |
| 1  | 0.811253000  | 2.877706000  | 0.808342000 |
| 1  | -0.701595000 | 2.919916000  | 1.469788000 |
| 8  | 1.939415000  | 0.679274000  | 4.536579000 |
| 7  | 3.287604000  | -3.292286000 | 3.920945000 |
| 5  | 3.691574000  | -2.130689000 | 3.150512000 |
| 5  | 2.394683000  | -3.101719000 | 5.029245000 |
| 5  | 1.876981000  | -1.567225000 | 5.298470000 |
| 8  | 4.611162000  | -2.172048000 | 2.094138000 |
| 1  | 4.976684000  | -3.058510000 | 1.987330000 |
| 7  | 3.206890000  | -0.835256000 | 3.438815000 |
| 7  | 2.342604000  | -0.569310000 | 4.437562000 |
| 1  | 3.583908000  | 0.001203000  | 2.952376000 |
| 7  | 1.093962000  | -6.320275000 | 2.876001000 |
| 5  | 3.436918000  | -7.051651000 | 3.790508000 |
| 8  | 0.996373000  | -5.949274000 | 4.231632000 |
| 8  | 3.055645000  | -5.198011000 | 2.280979000 |
| 7  | 2.510292000  | -6.413704000 | 2.609225000 |
| 5  | 3.867095000  | -4.600983000 | 3.469071000 |
| 7  | 3.775821000  | -5.758659000 | 4.554520000 |
| 1  | 5.011896000  | -4.541088000 | 3.065749000 |

|    |              |              |              |
|----|--------------|--------------|--------------|
| 1  | 4.655407000  | -5.892750000 | 5.060105000  |
| 1  | 3.049969000  | -5.516136000 | 5.238602000  |
| 8  | -0.171925000 | -8.248025000 | 4.637078000  |
| 15 | -0.174800000 | -6.710178000 | 5.132167000  |
| 8  | 0.130549000  | -6.398296000 | 6.553331000  |
| 7  | 0.859989000  | -0.810837000 | 6.204521000  |
| 1  | 1.038525000  | 0.160873000  | 5.735931000  |
| 1  | 1.055123000  | -0.790829000 | 7.203265000  |
| 1  | -0.116980000 | -1.068633000 | 6.055902000  |
| 1  | 0.832731000  | -5.445534000 | 2.390319000  |
| 1  | 2.833883000  | -7.913133000 | 4.396994000  |
| 1  | 2.091908000  | -4.070940000 | 5.717341000  |
| 1  | 2.563573000  | -7.003006000 | 1.772001000  |
| 7  | 5.274693000  | 0.687018000  | 1.078622000  |
| 8  | 9.102315000  | 3.648471000  | -4.262405000 |
| 7  | 4.720938000  | 4.662915000  | 0.729073000  |
| 1  | 4.183107000  | 5.231955000  | 1.366315000  |
| 7  | 5.997622000  | 1.292152000  | 0.193161000  |
| 5  | 5.708923000  | 4.965949000  | -0.233027000 |
| 5  | 8.366119000  | 4.789575000  | -3.662742000 |
| 5  | 5.740033000  | 2.710853000  | 0.145890000  |
| 7  | 7.040246000  | 4.358841000  | -3.020163000 |
| 5  | 3.999871000  | 2.522683000  | 1.914140000  |
| 7  | 4.758465000  | 3.305178000  | 0.990540000  |
| 7  | 6.350018000  | 3.753499000  | -0.644405000 |
| 7  | 4.387259000  | 1.110414000  | 1.893640000  |
| 5  | 7.413113000  | 3.592296000  | -1.649047000 |
| 7  | 3.009189000  | 2.972942000  | 2.799036000  |
| 8  | 8.681876000  | 4.342208000  | -1.235798000 |
| 7  | 9.226713000  | 5.057885000  | -2.297480000 |
| 1  | 5.884387000  | 6.072854000  | -0.695330000 |
| 1  | 8.348825000  | 5.790113000  | -4.338288000 |
| 1  | 6.493960000  | 5.190665000  | -2.787067000 |
| 1  | 6.440935000  | 3.768707000  | -3.606097000 |
| 1  | 7.670855000  | 2.428976000  | -1.905722000 |
| 1  | 10.154533000 | 4.659995000  | -2.498494000 |
| 1  | 2.609211000  | 2.278607000  | 3.432686000  |
| 1  | 2.323859000  | 3.653348000  | 2.501350000  |
| 1  | 5.407177000  | -0.333991000 | 1.136408000  |
| 5  | 3.615158000  | 0.510332000  | -1.790810000 |
| 8  | 3.449184000  | -0.774054000 | -1.271718000 |
| 1  | 3.618055000  | -1.458724000 | -1.929985000 |
| 8  | 7.526970000  | 1.608254000  | -4.343374000 |
| 8  | 7.393561000  | 3.246786000  | -6.244576000 |
| 7  | 3.298907000  | 4.819323000  | -2.521667000 |
| 8  | 6.703659000  | -2.228245000 | -5.529400000 |
| 7  | 2.907118000  | 1.504560000  | -1.074050000 |
| 5  | 6.848843000  | -0.758747000 | -5.381616000 |
| 7  | 2.869625000  | 2.803248000  | -1.437440000 |
| 7  | 5.489311000  | -0.056822000 | -5.152113000 |
| 5  | 4.433962000  | 2.189955000  | -3.419923000 |
| 5  | 3.579742000  | 3.284860000  | -2.535108000 |
| 7  | 4.404453000  | 0.833209000  | -2.969808000 |
| 5  | 5.064955000  | -0.335192000 | -3.645994000 |
| 8  | 2.106743000  | 3.588517000  | -0.689800000 |
| 8  | 6.416969000  | -0.730556000 | -2.998594000 |
| 7  | 7.461156000  | -0.598652000 | -3.888359000 |
| 7  | 8.233633000  | 0.597096000  | -3.669157000 |
| 1  | 2.270598000  | 1.234827000  | -0.293019000 |
| 1  | 7.578997000  | -0.267014000 | -6.213607000 |
| 1  | 5.588768000  | 0.956169000  | -5.284747000 |

|    |              |              |              |
|----|--------------|--------------|--------------|
| 1  | 4.778510000  | -0.371676000 | -5.818327000 |
| 1  | 5.048717000  | 2.464002000  | -4.443046000 |
| 1  | 4.382785000  | -1.344414000 | -3.611411000 |
| 1  | 8.116122000  | -1.362651000 | -3.690699000 |
| 1  | 8.044855000  | 0.822912000  | -2.676808000 |
| 8  | 9.649982000  | 1.854341000  | -5.861217000 |
| 15 | 8.383786000  | 2.677048000  | -5.293989000 |
| 1  | 2.616939000  | 4.791536000  | -1.686394000 |
| 1  | 4.097686000  | 5.397582000  | -2.253260000 |
| 1  | 2.862623000  | 5.214237000  | -3.353189000 |
| 7  | -1.406957000 | -0.944108000 | -0.915849000 |
| 8  | 4.315735000  | -3.161948000 | -5.273105000 |
| 8  | 4.890044000  | -2.052199000 | -7.451649000 |
| 8  | 1.867266000  | -6.291853000 | -4.273077000 |
| 7  | 1.217617000  | 0.419282000  | -3.650973000 |
| 1  | 1.479710000  | 1.383813000  | -3.803144000 |
| 7  | -0.716184000 | -1.831467000 | -1.544996000 |
| 5  | 1.711411000  | -0.804478000 | -4.160889000 |
| 5  | 2.507925000  | -5.113102000 | -4.897801000 |
| 5  | 0.198447000  | -1.253505000 | -2.496939000 |
| 7  | 1.542780000  | -3.905675000 | -5.006065000 |
| 5  | -0.469898000 | 1.046421000  | -1.834109000 |
| 7  | 0.324105000  | 0.159468000  | -2.626207000 |
| 7  | 1.087890000  | -1.887841000 | -3.453090000 |
| 7  | -1.404915000 | 0.336814000  | -0.962978000 |
| 5  | 1.348182000  | -3.338248000 | -3.516923000 |
| 7  | -0.413888000 | 2.462162000  | -1.798430000 |
| 8  | 2.766631000  | -3.642487000 | -2.930458000 |
| 7  | 3.469609000  | -4.538241000 | -3.709223000 |
| 7  | 4.697729000  | -3.964576000 | -4.172268000 |
| 1  | 2.461459000  | -0.888153000 | -5.103699000 |
| 1  | 3.162901000  | -5.373202000 | -5.879425000 |
| 1  | 1.970452000  | -3.189921000 | -5.599636000 |
| 1  | 0.638328000  | -4.146271000 | -5.422361000 |
| 1  | 0.522257000  | -4.020629000 | -2.943344000 |
| 1  | 3.762240000  | -5.320451000 | -3.111734000 |
| 1  | 4.910131000  | -3.257779000 | -3.448942000 |
| 1  | -1.046708000 | 2.864216000  | -1.103844000 |
| 1  | 0.495456000  | 2.911364000  | -1.703040000 |
| 8  | 6.150484000  | -4.304007000 | -6.737192000 |
| 15 | 5.520390000  | -2.864137000 | -6.375911000 |
| 1  | -2.096449000 | -1.309210000 | -0.240039000 |
| 5  | -3.702251000 | -2.379847000 | -3.045555000 |
| 8  | -4.638737000 | -2.483139000 | -2.011140000 |
| 1  | -4.951145000 | -3.390279000 | -1.909964000 |
| 8  | -0.698667000 | -6.074758000 | -4.058940000 |
| 8  | 0.244027000  | -6.585662000 | -6.335530000 |
| 7  | -0.903380000 | -0.883477000 | -6.050506000 |
| 7  | -3.318238000 | -1.051286000 | -3.340565000 |
| 5  | -3.073810000 | -7.271117000 | -3.699976000 |
| 7  | -2.444137000 | -0.726750000 | -4.316768000 |
| 7  | -3.475936000 | -5.998785000 | -4.460365000 |
| 5  | -2.275854000 | -3.261670000 | -4.873932000 |
| 5  | -1.879371000 | -1.695298000 | -5.149918000 |
| 7  | -3.184656000 | -3.513283000 | -3.791927000 |
| 5  | -3.685780000 | -4.861577000 | -3.367995000 |
| 8  | -2.136206000 | 0.546222000  | -4.418539000 |
| 8  | -2.875116000 | -5.419114000 | -2.156738000 |
| 7  | -2.241339000 | -6.593583000 | -2.476949000 |
| 7  | -0.825946000 | -6.405938000 | -2.696795000 |
| 1  | -3.754039000 | -0.240749000 | -2.862446000 |

|    |               |              |              |
|----|---------------|--------------|--------------|
| 1  | -2.400680000  | -8.089007000 | -4.289307000 |
| 1  | -4.325987000  | -6.191268000 | -4.998578000 |
| 1  | -2.745270000  | -5.697374000 | -5.115450000 |
| 1  | -1.871714000  | -4.209619000 | -5.541044000 |
| 1  | -4.843773000  | -4.885610000 | -3.002858000 |
| 1  | -2.284318000  | -7.193552000 | -1.646930000 |
| 1  | -0.642319000  | -5.501150000 | -2.231776000 |
| 8  | 0.523172000   | -8.366561000 | -4.352756000 |
| 15 | 0.512179000   | -6.845499000 | -4.896418000 |
| 1  | -1.139505000  | 0.077420000  | -5.605938000 |
| 1  | 0.085251000   | -1.086082000 | -5.891795000 |
| 1  | -1.092931000  | -0.886359000 | -7.050611000 |
| 1  | 0.643996000   | -8.672222000 | 4.941250000  |
| 1  | -5.106435000  | -4.580130000 | 7.584119000  |
| 1  | -9.192833000  | 1.716867000  | 7.114310000  |
| 1  | 9.351457000   | 1.264621000  | -6.568960000 |
| 1  | 5.536962000   | -4.791814000 | -7.305157000 |
| 1  | -0.262670000  | -8.821942000 | -4.689799000 |
| 7  | -7.106535000  | 1.791292000  | -3.561648000 |
| 7  | -9.438777000  | 9.499488000  | -3.554709000 |
| 5  | -8.635603000  | 8.513016000  | -1.369034000 |
| 8  | -8.120032000  | 9.808275000  | -3.847152000 |
| 7  | -7.332174000  | 5.704768000  | -3.061988000 |
| 8  | -9.143851000  | 7.172995000  | -3.232348000 |
| 7  | -8.011603000  | 2.269057000  | -2.666629000 |
| 5  | -6.284422000  | 2.583953000  | -4.316110000 |
| 7  | -9.529820000  | 8.383806000  | -2.600265000 |
| 7  | -5.829812000  | 5.076092000  | -4.562587000 |
| 7  | -6.446078000  | 3.963766000  | -4.037547000 |
| 7  | -8.202770000  | 3.551194000  | -2.405689000 |
| 8  | -5.525090000  | 2.059867000  | -5.113066000 |
| 5  | -6.391939000  | 6.075621000  | -3.951637000 |
| 5  | -8.266707000  | 6.439280000  | -2.412868000 |
| 5  | -7.382717000  | 4.338626000  | -3.122436000 |
| 7  | -8.730144000  | 1.359599000  | -2.006146000 |
| 7  | -7.566088000  | 7.464774000  | -1.597247000 |
| 8  | -9.408304000  | 8.243367000  | -0.200038000 |
| 1  | -7.036389000  | 0.790275000  | -3.676604000 |
| 1  | -9.936651000  | 9.798692000  | -3.801357000 |
| 1  | -8.194636000  | 9.508053000  | -1.316785000 |
| 1  | -10.564498000 | 8.290637000  | -2.270515000 |
| 1  | -6.129661000  | 7.106239000  | -4.138688000 |
| 1  | -8.845171000  | 5.788805000  | -1.756306000 |
| 1  | -7.222276000  | 7.044795000  | -0.651433000 |
| 1  | -6.729277000  | 7.888014000  | -2.152548000 |
| 1  | -8.590930000  | 0.375944000  | -2.188631000 |
| 1  | -9.413509000  | 1.654356000  | -1.322959000 |
| 1  | -8.092452000  | 10.537686000 | -4.471219000 |
| 7  | -9.746736000  | 5.964404000  | 1.655297000  |
| 8  | -8.682433000  | 6.851593000  | 1.634836000  |
| 8  | -9.895268000  | 8.965884000  | 1.988496000  |
| 15 | -8.843167000  | 8.337575000  | 1.187660000  |
| 8  | -7.539225000  | 8.993286000  | 1.144919000  |
| 1  | -10.344454000 | 6.122878000  | 1.529135000  |
| 8  | 4.621290000   | -7.530974000 | 3.066598000  |
| 7  | 7.581536000   | -2.689890000 | 3.359277000  |
| 7  | 7.041083000   | -6.652798000 | 1.609409000  |
| 5  | 9.296239000   | -5.589765000 | 2.035446000  |
| 8  | 6.947235000   | -6.892463000 | 2.970365000  |
| 8  | 7.349094000   | -4.308890000 | 1.732328000  |
| 7  | 7.583098000   | -1.327572000 | 3.145987000  |



|    |              |              |              |
|----|--------------|--------------|--------------|
| 5  | 6.828137000  | -3.252159000 | 4.313621000  |
| 7  | 7.947254000  | -5.529553000 | 1.323679000  |
| 7  | 6.111866000  | -2.482850000 | 5.144336000  |
| 8  | 8.240610000  | -0.848363000 | 2.236056000  |
| 7  | 6.864332000  | -0.537343000 | 3.964008000  |
| 5  | 8.267865000  | -3.514988000 | 2.442192000  |
| 8  | 6.229138000  | -9.247672000 | 2.931436000  |
| 5  | 6.147906000  | -1.065705000 | 4.944510000  |
| 7  | 5.439576000  | -0.251893000 | 5.727262000  |
| 7  | 9.199535000  | -4.488047000 | 3.070385000  |
| 15 | 5.972407000  | -7.954366000 | 3.566740000  |
| 8  | 5.997489000  | -7.896722000 | 5.025967000  |
| 8  | 10.336227000 | -5.345506000 | 1.089759000  |
| 1  | 6.733952000  | -6.984589000 | 1.167510000  |
| 1  | 9.433866000  | -6.558905000 | 2.516883000  |
| 1  | 6.797549000  | -4.327756000 | 4.412730000  |
| 1  | 8.123075000  | -5.488268000 | 0.248245000  |
| 1  | 5.524898000  | -2.917335000 | 5.940314000  |
| 1  | 8.820871000  | -2.890195000 | 1.740905000  |
| 1  | 8.794643000  | -4.866941000 | 4.009303000  |
| 1  | 10.176317000 | -4.031213000 | 3.233029000  |
| 1  | 4.877443000  | -0.632622000 | 6.475150000  |
| 1  | 5.464872000  | 0.745920000  | 5.572533000  |
| 1  | 11.187054000 | -5.383431000 | 1.532320000  |
| 7  | 7.916215000  | 2.681319000  | 2.458618000  |
| 8  | 7.672764000  | 10.225438000 | 3.458048000  |
| 8  | 9.026631000  | 8.714337000  | -0.187518000 |
| 7  | 5.610597000  | 5.430110000  | 4.290847000  |
| 7  | 8.044817000  | 3.964496000  | 2.165782000  |
| 5  | 6.123567000  | 6.436611000  | 3.654807000  |
| 5  | 8.249664000  | 8.942385000  | 0.987260000  |
| 5  | 7.190990000  | 4.729476000  | 2.864290000  |
| 7  | 7.255264000  | 7.827221000  | 1.236066000  |
| 7  | 8.676948000  | 1.789582000  | 1.819483000  |
| 5  | 6.179032000  | 2.955198000  | 4.104242000  |
| 7  | 6.276833000  | 4.331489000  | 3.789332000  |
| 7  | 7.077214000  | 6.090465000  | 2.770989000  |
| 7  | 7.035578000  | 2.183313000  | 3.366876000  |
| 5  | 8.033283000  | 6.859227000  | 2.054393000  |
| 8  | 8.866683000  | 7.659937000  | 2.857103000  |
| 7  | 9.162501000  | 8.887017000  | 2.208974000  |
| 8  | 5.445413000  | 2.415049000  | 4.915630000  |
| 7  | 9.005610000  | 10.003157000 | 3.154965000  |
| 1  | 5.814523000  | 7.458910000  | 3.818178000  |
| 1  | 7.740784000  | 9.905113000  | 0.930336000  |
| 1  | 6.932176000  | 7.375074000  | 0.298092000  |
| 1  | 6.397748000  | 8.197883000  | 1.796014000  |
| 1  | 7.013150000  | 1.183182000  | 3.505875000  |
| 1  | 8.631529000  | 6.215151000  | 1.411369000  |
| 1  | 10.197934000 | 8.860336000  | 1.870387000  |
| 1  | 9.484949000  | 10.340731000 | 3.389760000  |
| 1  | 9.343911000  | 2.099876000  | 1.128301000  |
| 1  | 8.584455000  | 0.805808000  | 2.027027000  |
| 1  | 7.601104000  | 10.957489000 | 4.075148000  |
| 8  | 8.359134000  | 7.173613000  | -1.930239000 |
| 8  | 7.090124000  | 9.242835000  | -1.437185000 |
| 7  | 9.475871000  | 6.354673000  | -1.959268000 |
| 1  | 10.065520000 | 6.551146000  | -1.844465000 |
| 8  | 9.433061000  | 9.356691000  | -2.308546000 |
| 15 | 8.431837000  | 8.668934000  | -1.492015000 |
| 8  | -4.251946000 | -7.857073000 | -3.043378000 |

|    |               |               |              |
|----|---------------|---------------|--------------|
| 7  | -7.488444000  | -1.735346000  | -3.254276000 |
| 8  | -6.589563000  | -7.238905000  | -2.940838000 |
| 8  | -5.560841000  | -8.189175000  | -4.983724000 |
| 8  | -8.169417000  | -1.265405000  | -2.356979000 |
| 8  | -10.081013000 | -5.890539000  | -1.097308000 |
| 7  | -6.805243000  | -0.931309000  | -4.090610000 |
| 8  | -5.733991000  | -9.547737000  | -2.889567000 |
| 5  | -9.019450000  | -6.074946000  | -2.032399000 |
| 5  | -6.058306000  | -1.451800000  | -5.053621000 |
| 7  | -8.977701000  | -4.970574000  | -3.068422000 |
| 15 | -5.547514000  | -8.243039000  | -3.524970000 |
| 5  | -6.640266000  | -3.649677000  | -4.373004000 |
| 7  | -5.956769000  | -2.868582000  | -5.219317000 |
| 7  | -7.421801000  | -3.100818000  | -3.433642000 |
| 5  | -8.110411000  | -3.944600000  | -2.433049000 |
| 8  | -7.153944000  | -4.682142000  | -1.710946000 |
| 7  | -7.684255000  | -5.934263000  | -1.306600000 |
| 7  | -5.390580000  | -0.622758000  | -5.859015000 |
| 7  | -6.710635000  | -7.003463000  | -1.581060000 |
| 1  | -9.095402000  | -7.050394000  | -2.512685000 |
| 1  | -9.974576000  | -4.576293000  | -3.260426000 |
| 1  | -8.525157000  | -5.331951000  | -3.992790000 |
| 1  | -6.561675000  | -4.724686000  | -4.448176000 |
| 1  | -5.347355000  | -3.294816000  | -6.002464000 |
| 1  | -8.696585000  | -3.322740000  | -1.755432000 |
| 1  | -7.872561000  | -5.902092000  | -0.233460000 |
| 1  | -6.389776000  | -7.316221000  | -1.135940000 |
| 1  | -5.466427000  | 0.375889000   | -5.730063000 |
| 1  | -4.810614000  | -0.994289000  | -6.597740000 |
| 1  | -10.924323000 | -5.978100000  | -1.547976000 |
| 1  | -10.585218000 | 9.377916000   | 2.513662000  |
| 1  | 10.089775000  | 9.807796000   | -2.844112000 |
| 1  | -5.856280000  | -10.403832000 | -2.472737000 |
| 1  | 6.397487000   | -10.095998000 | 2.514780000  |
| 1  | -5.111445000  | 5.108122000   | -5.257514000 |
| 1  | 4.893664000   | 5.446563000   | 4.987794000  |

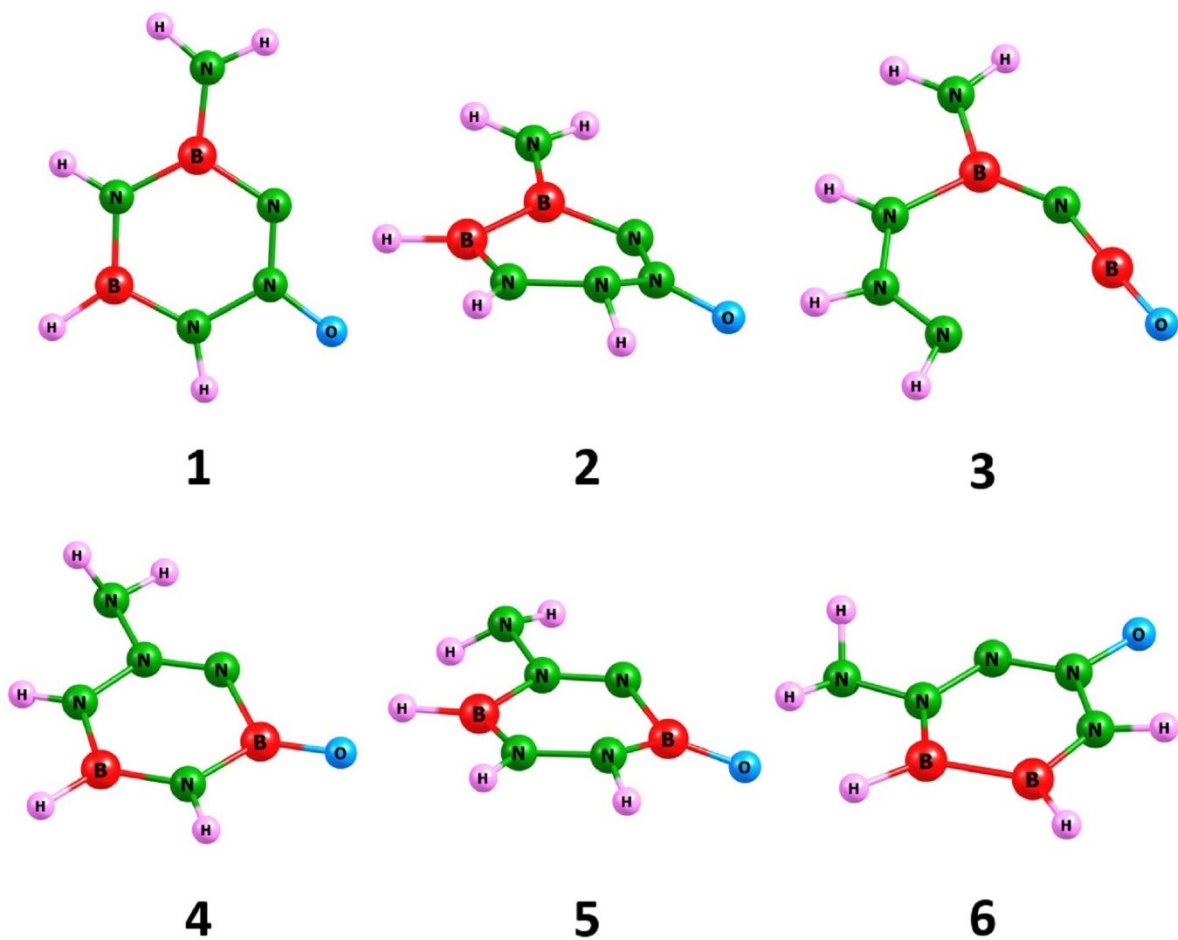

**Figure S1.** Isomeric structures of carbonless cytosine optimized at the  $\omega$ B97XD/aug-cc-pVDZ theory level.

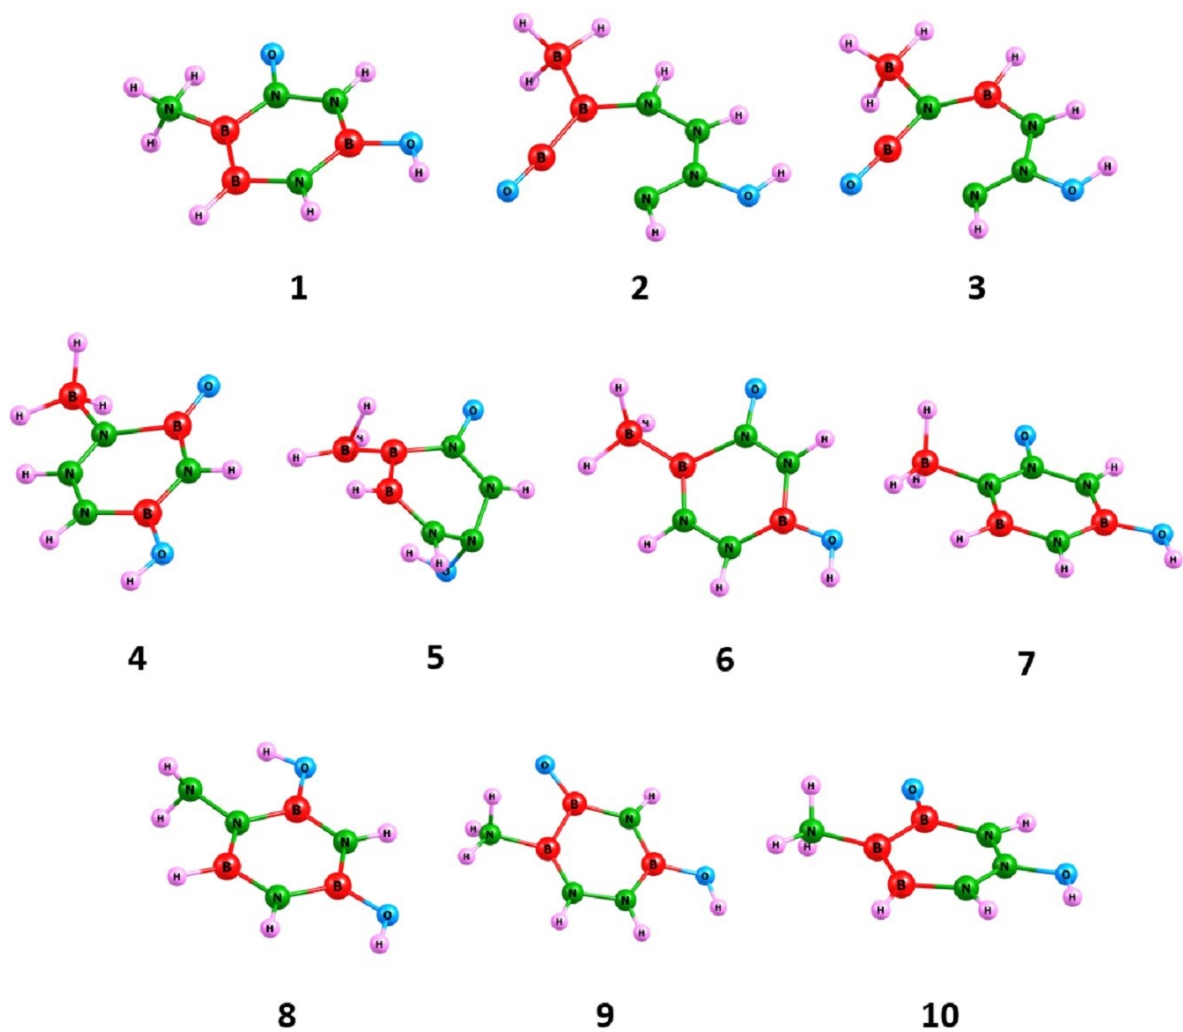

**Figure S2.** Isomeric structures of carbonless thymine optimized at the  $\omega$ B97XD/aug-cc-pVDZ theory level.

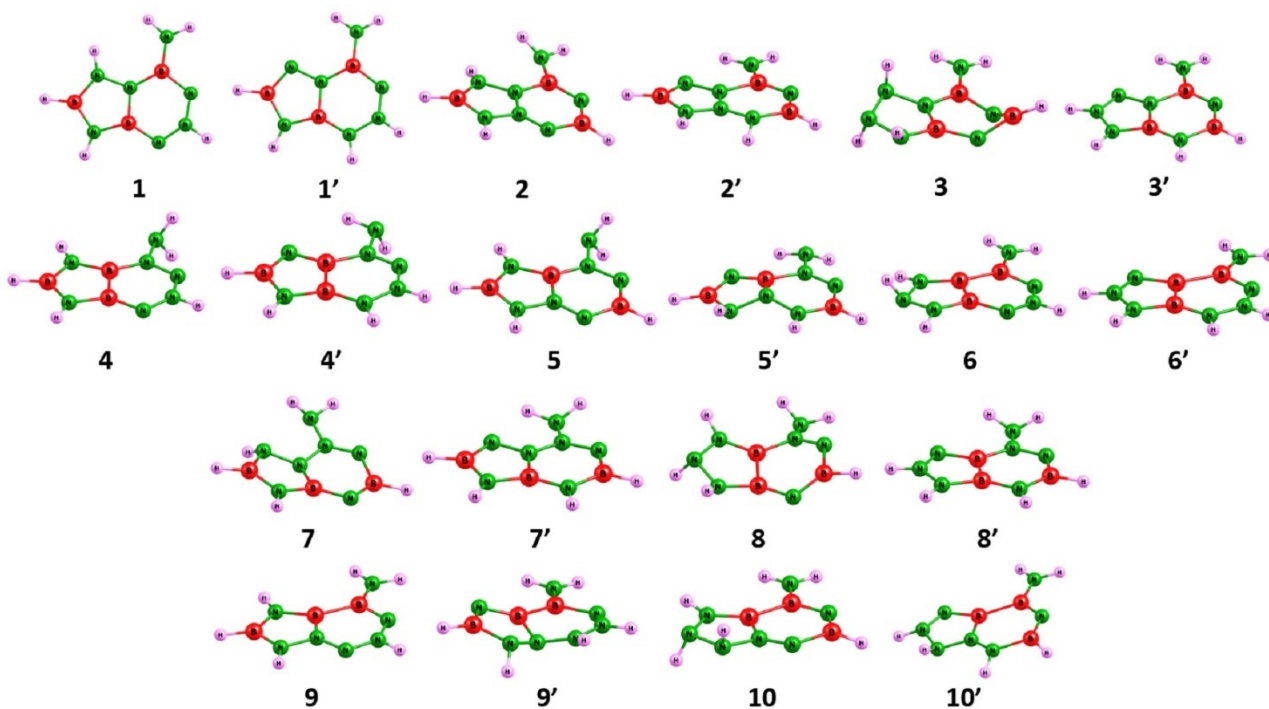

**Figure S3.** Isomeric structures of carbonless adenine optimized at the  $\omega$ B97XD/aug-cc-pVDZ theory level.

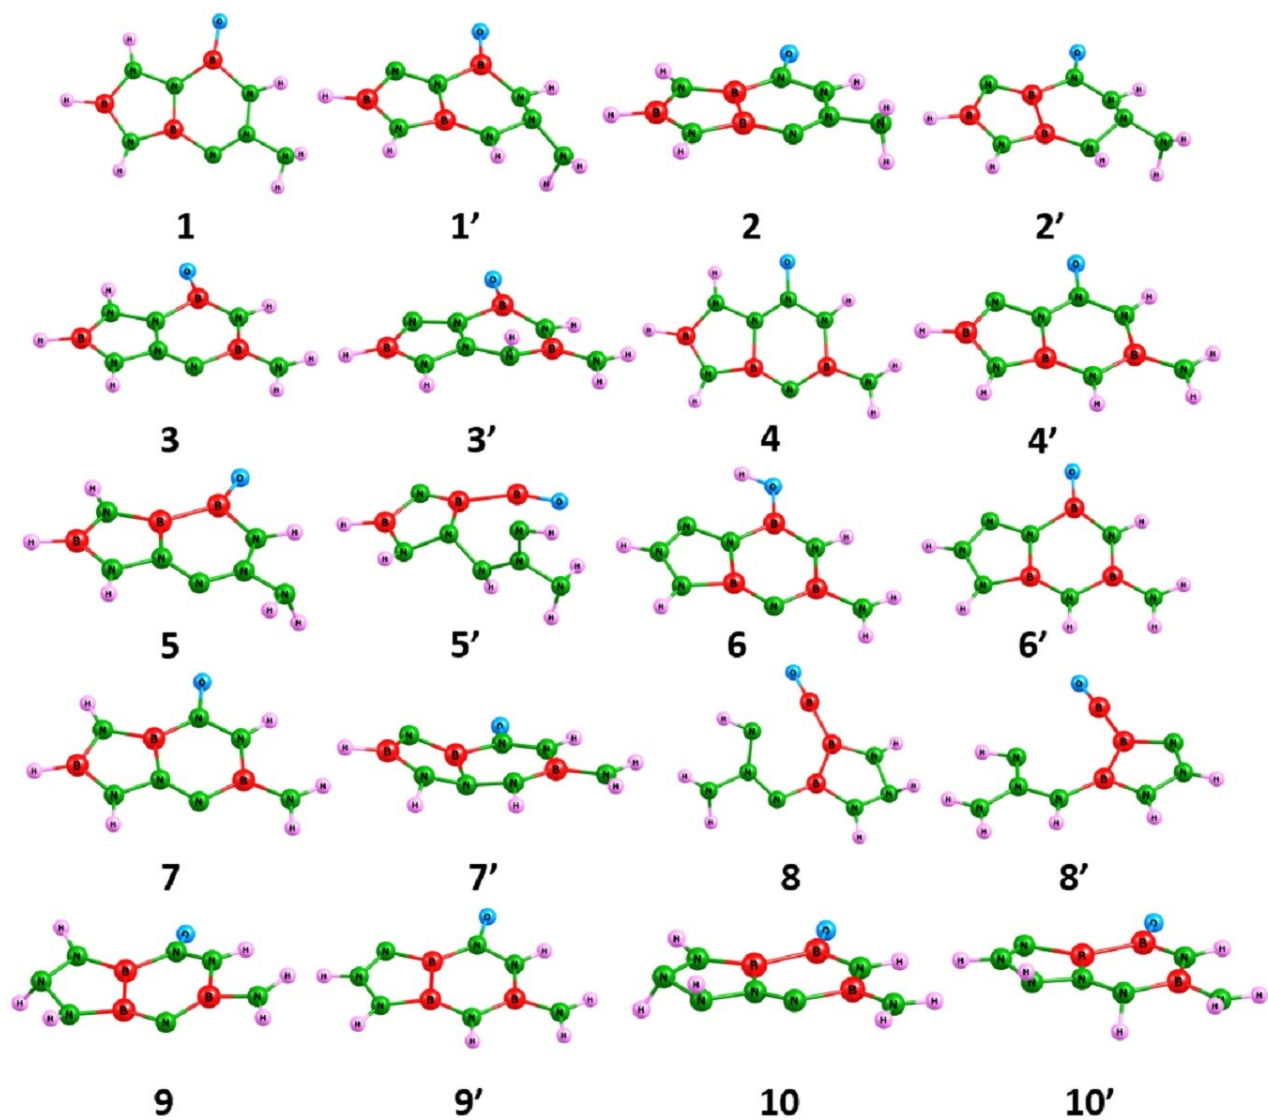

**Figure S4.** Isomeric structures of carbonless guanine optimized at the  $\omega$ B97XD/aug-cc-pVDZ theory level.
